# Supplementary material
Source: Springer Nature journal article supplement (https://www.springermedizin.de/resource/supplementary/12889_2009_1867_MOESM4_ESM.pdf/9504240)

**G1** chronic liver disease and cirrhosis

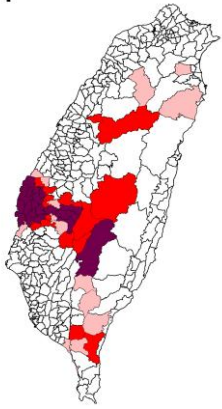

**G2** chronic liver disease and cirrhosis

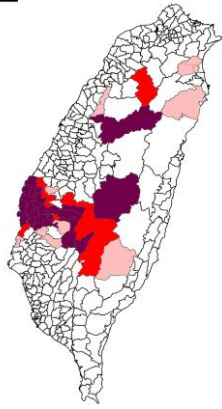

**H1** nephritis, nephritic syndrome and nephrosis

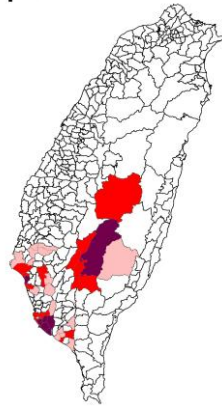

**H2** nephritis, nephritic syndrome and nephrosis

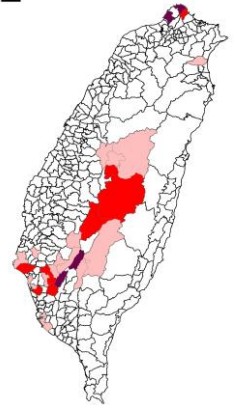

**I1** suicide

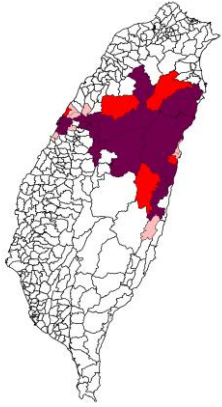

**I2** suicide

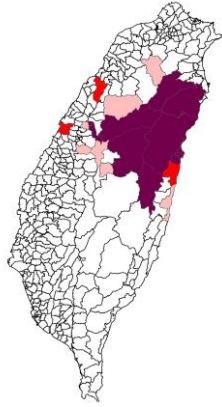

**J1** hypertensive disease

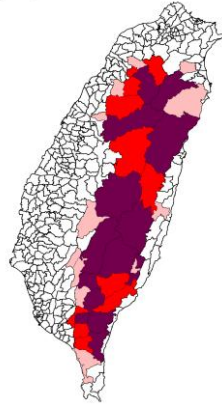

**J2** hypertensive disease

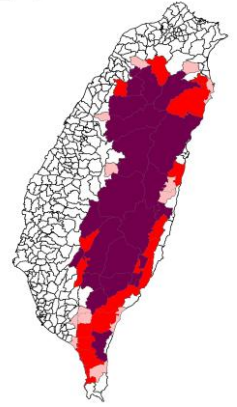

**K1** bronchitis, emphysema and asthma

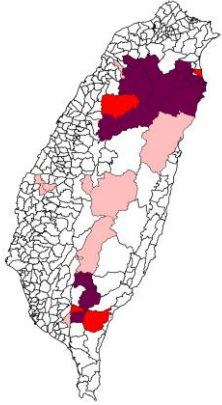

**K2** bronchitis, emphysema and asthma

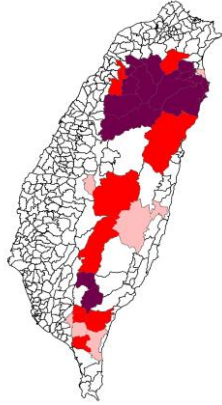

**L1** septicaemia

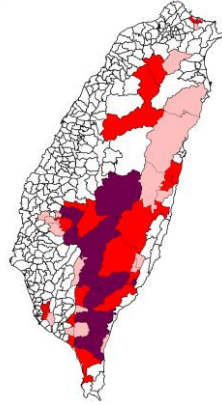

**L2** septicaemia

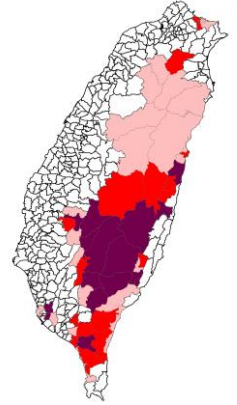

**M1** tuberculosis

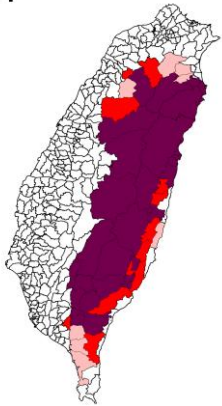

**M2** tuberculosis

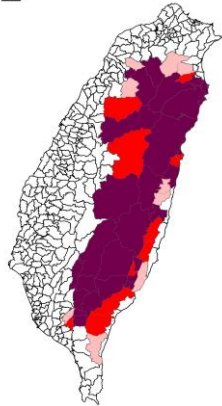

**N1** ulcer of stomach and duodenum

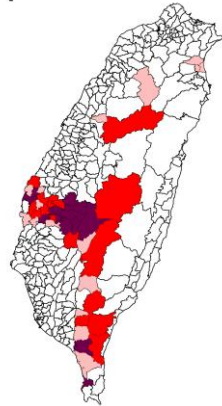

**N2** ulcer of stomach and duodenum

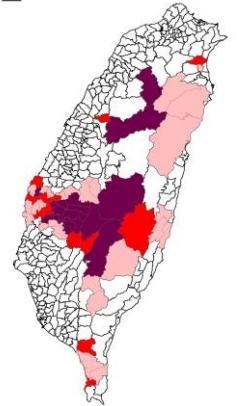

Supplement: MOESM4 [file 9504240]
